# Supplementary material for: Development of the First Tritiated Tetrazine: Facilitating Tritiation of Proteins
Source: PubMed Central journal article supplement (PMC10100488; doi:10.1002/cbic.202200539), 2022-11-04
Supplement: CBIC-23-0-s001.pdf [file CBIC-23-0-s001.pdf]

# ChemBioChem

Supporting Information

## **Development of the First Tritiated Tetrazine: Facilitating Tritiation of Proteins**

Natasha Shalina Radjani Bidesi<sup>+</sup>, Umberto Maria Battisti<sup>+</sup>, Sara Lopes van de Broek, Vladimir Shalgunov, Anne-Mette Dall, Jesper Bøggild Kristensen, Dag Sehlin, Stina Syvänen, Gitte Moos Knudsen, and Matthias Manfred Herth\*

## Table of Contents

|                                |     |
|--------------------------------|-----|
| 1. Radiolabeling               | S2  |
| 2. HPLC Traces                 | S6  |
| 3. Pretargeted Autoradiography | S9  |
| 4. NMR Spectra                 | S12 |

## 2. Radiolabeling

**Table S1.** Reagents and conditions for Pd-catalyzed hydrodehalogenations of Tz **1-6**.

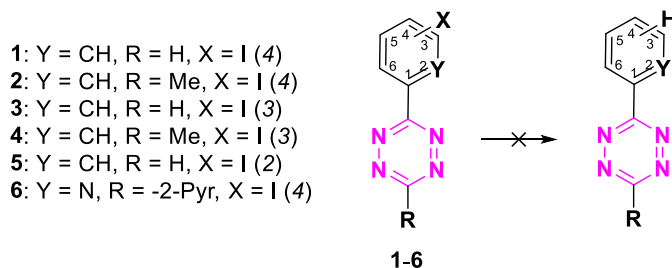

| Entry | Reagent      | Catalyst                                     | H-source                         | Base/Acid           | Solvent          | Temperature    | Time  | Conversion | Ref     |
|-------|--------------|----------------------------------------------|----------------------------------|---------------------|------------------|----------------|-------|------------|---------|
| 1     | <b>1-6</b>   | Pd/C                                         | H <sub>2</sub> (g)               | -                   | EtOH             | R.T. to 100 °C | 1h-3d | -          | [1]     |
| 2     | <b>1-6</b>   | Pd/C                                         | H <sub>2</sub> (g)               | TEA                 | EtOH             | R.T. to 100 °C | 1h-3d | -          | [1a, 2] |
| 3     | <b>1-6</b>   | Pd/C                                         | H <sub>2</sub> (g)               | TEA                 | MeOH             | R.T. to 100 °C | 1h-3d | -          | [1a, 2] |
| 4     | <b>1-6</b>   | Pd/C                                         | HCO <sub>2</sub> NH <sub>4</sub> | -                   | MeOH/THF         | R.T. to 100 °C | 1h-3d | -          | [3]     |
| 5     | <b>1,2,6</b> | Pd/C                                         | H <sub>2</sub> (g)               | NH <sub>4</sub> OH  | MeOH             | R.T. to 100 °C | 1h-3d | -          | [4]     |
| 6     | <b>1,2,6</b> | Pd/C                                         | H <sub>2</sub> (g)               | Hunig's base        | DMF              | R.T. to 100 °C | 1h-3d | -          | [5]     |
| 7     | <b>1,2,6</b> | Pd/C                                         | H <sub>2</sub> (g)               | -                   | THF              | R.T. to 100 °C | 1h-3d | -          | -       |
| 8     | <b>1-6</b>   | PtO <sub>2</sub>                             | H <sub>2</sub> (g)               | -                   | EtOH             | R.T. to 100 °C | 1h-3d | -          | [1a, 6] |
| 9     | <b>1-6</b>   | Pd(dba) <sub>2</sub>                         | H <sub>2</sub> (g)               | -                   | MeOH             | R.T. to 100 °C | 1h-3d | -          | -       |
| 10    | <b>1-6</b>   | Pd(dba) <sub>2</sub> ,<br>SiMes.HCl,<br>KOMe | H <sub>2</sub> (g)               | KOMe                | dioxane          | 100 °C         | 1h-3d | -          | [7]     |
| 11    | <b>1-6</b>   | Pd(PPh <sub>3</sub> ) <sub>4</sub>           | H <sub>2</sub> (g)               | HCO <sub>2</sub> Na | MeOH             | R.T. to 100 °C | 1h-3d | -          | [8]     |
| 12    | <b>1,2,6</b> | Pd(PPh <sub>3</sub> ) <sub>4</sub>           | H <sub>2</sub> (g)               | -                   | THF              | R.T. to 100 °C | 1h-3d | -          | [8]     |
| 13    | <b>1-6</b>   | PdCl <sub>2</sub>                            | TMDS                             | -                   | H <sub>2</sub> O | R.T.           | 1h-3d | -          | [9]     |

#### *General reduction entry 1*

To a solution of Tz **1-6** (10 mg) in ethanol (0.1 mL) was added Pd/C (10 wt.%, 1 mg) at argon atmosphere. Consequently, the reaction mixture was charged with hydrogen while the flask was connected to a vacuum line. The mixture was stirred at room temperature for 24 h and monitored frequently. After 24 hours the temperature was raised to 100 °C, and monitored for 48 h. For all 6 Tzs no reduction was observed, based on LC-MS, TLC and NMR after filtration of the Pd/C, evaporation of the solvent.

#### *General reduction entry 2*

To general reduction entry 1, 4 µL trimethylamine was added. For all 6 Tzs no reduction was observed, based on LC-MS, TLC and NMR after filtration of the Pd/C, evaporation of the solvent.

#### *General reduction entry 3*

To general reduction entry 1, instead of ethanol, methanol was used. Caution was taken that all glassware and stirring bars were vacuum oven dried before use, and glassware was purged 3 x with argon. For all 6 Tzs no reduction was observed, based on LC-MS, TLC and NMR after filtration of the Pd/C, evaporation of the solvent. Hence, the compounds

#### *General reduction entry 4*

To a solution of Tz **1-6** (10 mg) in ethanol (0.1 mL) was added 1 ml of a saturated solution of HCO<sub>2</sub>NH<sub>4</sub> (40-50 mg of HCO<sub>2</sub>NH<sub>4</sub> in MeOH/THF, 2/1). Subsequently, Pd/C (10 wt.%, 1 mg) was added to the flask at argon atmosphere. The mixture was stirred at room temperature for 24 h and monitored frequently. After 24 hours the temperature was raised to 150 °C, and monitored for 48 h. For all 6 Tzs no reduction was observed, based on LC-MS, TLC and NMR after filtration of the Pd/C and drying of the filtrate in vacuo.

#### *General reduction entry 5*

To general reduction entry 3, 40 µl of HCl in dioxane (8M) was added. For all 3 Tzs (**1, 2, 6**) no reduction was observed, based on LC-MS, TLC and NMR after filtration of the Pd/C, evaporation of the solvent.

#### *General reduction entry 6*

To general reduction entry 3, 4  $\mu\text{L}$  saturated  $\text{NaHCO}_3$  was added. THF was used as solvent instead of MeOH. For all 3 Tzs (**1**, **2**, **6**) no reduction was observed, based on LC-MS, TLC and NMR after filtration of the Pd/C, evaporation of the solvent.

*General reduction entry 7*

To general reduction entry 1, instead of ethanol, THF was used. For all 3 Tzs (**1**, **2**, **6**) no reduction was observed, based on LC-MS, TLC and NMR after filtration of the Pd/C, evaporation of the solvent.

*General reduction entry 8*

To general reduction entry 1, instead of Pd/C, 10 wt%  $\text{PtO}_2$  was used. For all 6 Tzs no reduction was observed, based on LC-MS, TLC and NMR after filtration of the  $\text{PtO}_2$ , evaporation of the solvent.

*General reduction entry 9*

To general reduction entry 1, instead of Pd/C, 10 wt%  $\text{Pd}(\text{dba})_2$  was used. For all 6 Tzs no reduction was observed, based on LC-MS, TLC and NMR after filtration of the  $\text{PtO}_2$ , evaporation of the solvent.

*General reduction entry 10*

To a solution of 10 mg (1 eq.) Tz **1-6** was added  $\text{Pd}(\text{dba})_2$  (0.02 eq.),  $\text{SiMe}_3\text{HCl}$  (0.02 eq.), KOMe (2 eq.), 100 mL of dioxane. Reaction vial was closed and purged with argon. Consequently, the reaction mixture was heated until 100  $^\circ\text{C}$ . For all 6 Tzs no reduction was observed, based on LC-MS, TLC and NMR after filtration of the  $\text{PtO}_2$ , evaporation of the solvent.

*General reduction entry 11*

To a solution of 10 mg (1 eq.) Tz **1-6** was added  $\text{Pd}(\text{PPh}_3)_4$  (0.10 eq.),  $\text{HCOONa}$  (0.2 eq.), 100 mL of MeOH. Reaction vial was closed and purged with argon. Consequently, the reaction mixture was heated until 100  $^\circ\text{C}$ . For all 11 Tzs no reduction was observed, based on LC-MS and TLC.

*General reduction entry 12*

To a solution of 10 mg (1 eq.) Tz **1-6** was added Pd(PPh<sub>3</sub>)<sub>4</sub> (0.10 eq.) in 100 mL of MeOH. Reaction vial was closed and purged with argon. Consequently, the reaction mixture was heated until 100 °C. Consequently, the reaction mixture was charged with hydrogen while the flask was connected to a vacuum line. The mixture was stirred at room temperature for 24 h and monitored frequently. After 24 hours the temperature was raised to 100 °C, and monitored for 48 h. For all 6 Tzs no reduction was observed, based on LC-MS and TLC.

#### *General reduction entry 13*

To a solution of Tz **1-6** (10 mg) in deionized water (0.1 mL) was added PdCl<sub>2</sub> (0.05 eq.). The reaction mixture was stirred for 10 min. To the reaction mixture was added TMDS (0.4 eq.), dropwise. The mixture was stirred at room temperature for 3 days and monitored frequently. For all 6 Tz's no reduction was observed, based on LC-MS and TLC.

#### *3-(4-propoxyphenyl)-1,2,4,5-tetrazine*

Tz **7** was subjected to general reduction entry 1, 2 and 4. No reduction was observed, based on LC-MS, TLC and NMR after filtration of the Pd/C, and evaporation of the solvent.

#### *3-(4-vinylphenyl)-1,2,4,5-tetrazine*

To **8** (50 mg, 0.27 mmol), dissolved in 2 mL MeOH was added 2.5 mg of Lindlar catalyst and 25 mg of quinoline. Hydrogen gas contained in a balloon was bubbled into the reaction mixture at room temperature for 3 days. Reaction was monitored by TLC and LC-MS, however after 5 days no conversion was observed yet.

#### *3,6-di(pyridin-2-yl)-1,2-dihydro-1,2,4,5-tetrazine*

Tz **9** was subjected to general reduction entry 1,2 and 4. No reduction was observed, based on LC-MS, TLC and NMR after filtration of the Pd/C, and evaporation of the solvent. Hence the product **14** or **12** were never obtained.

SI-2-1 HPLC Chromatograms of Precursor and References **12-15** plus dihydro-intermediate

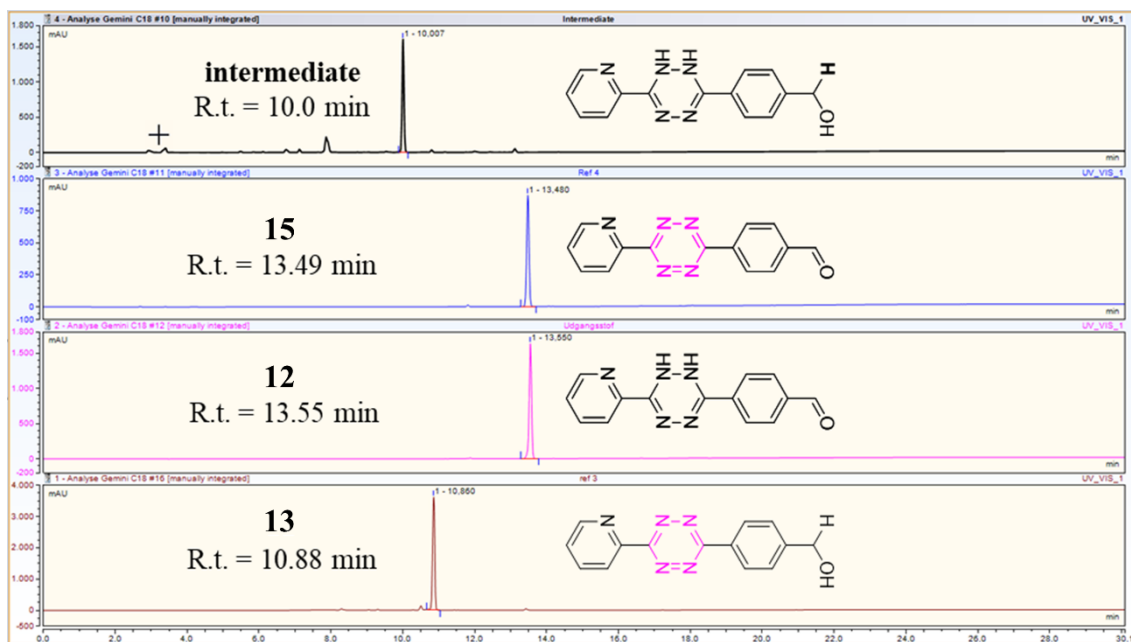

SI-2-2 Crude <sup>3</sup>H-Tz 16 Radio-HPLC Chromatogram

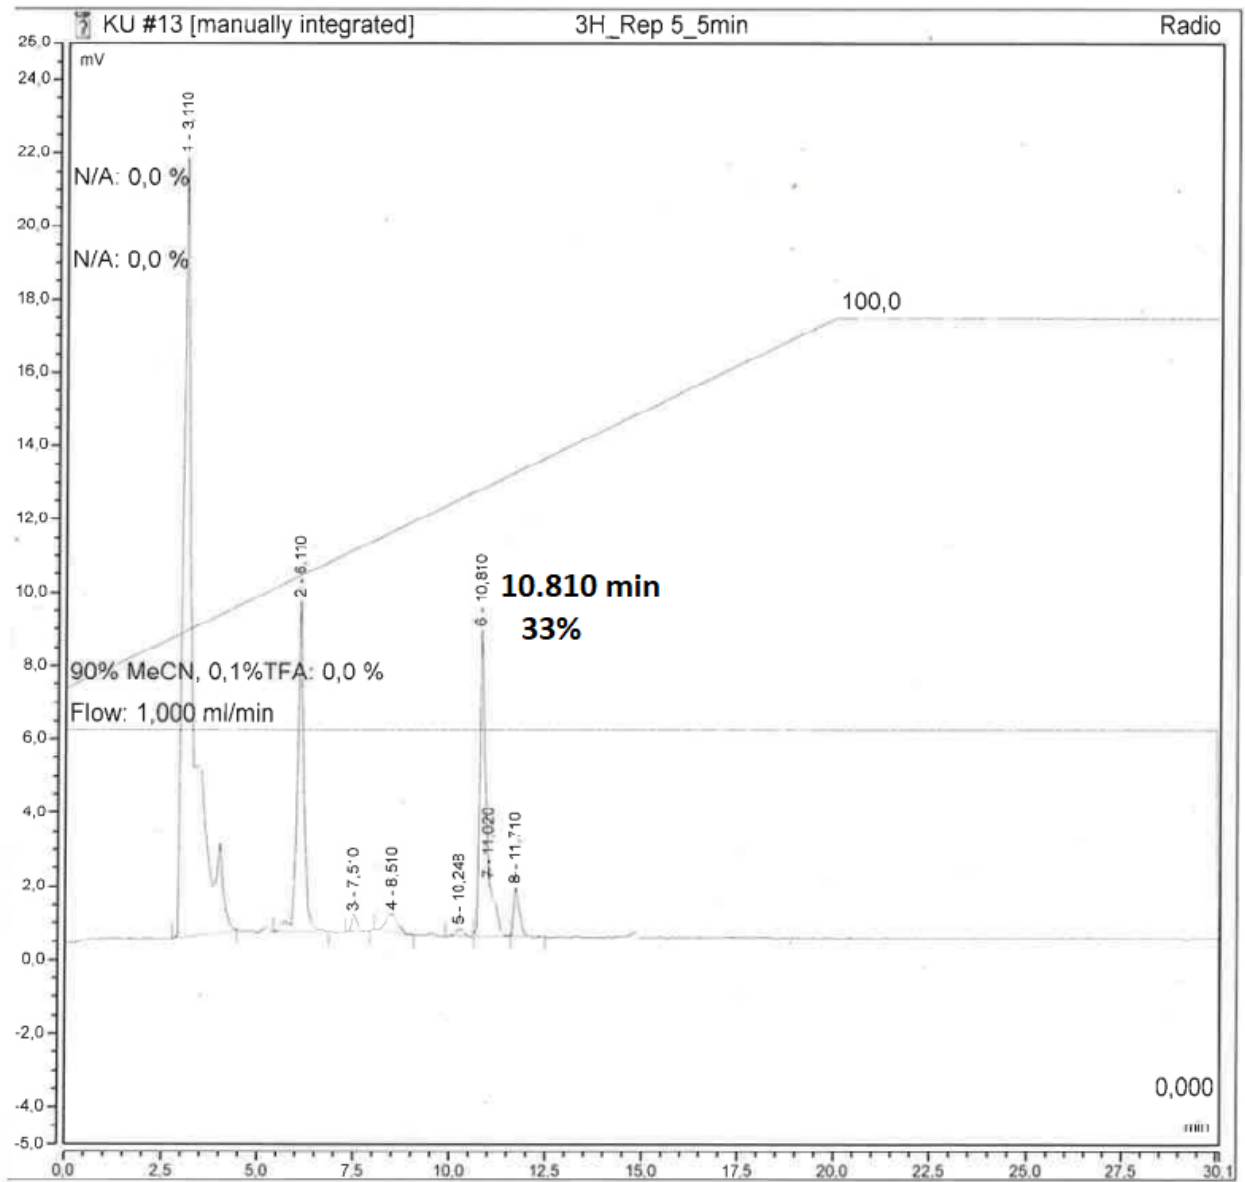



SI-2-3 Crude <sup>3</sup>H-Tz 16 UV-HPLC Chromatogram

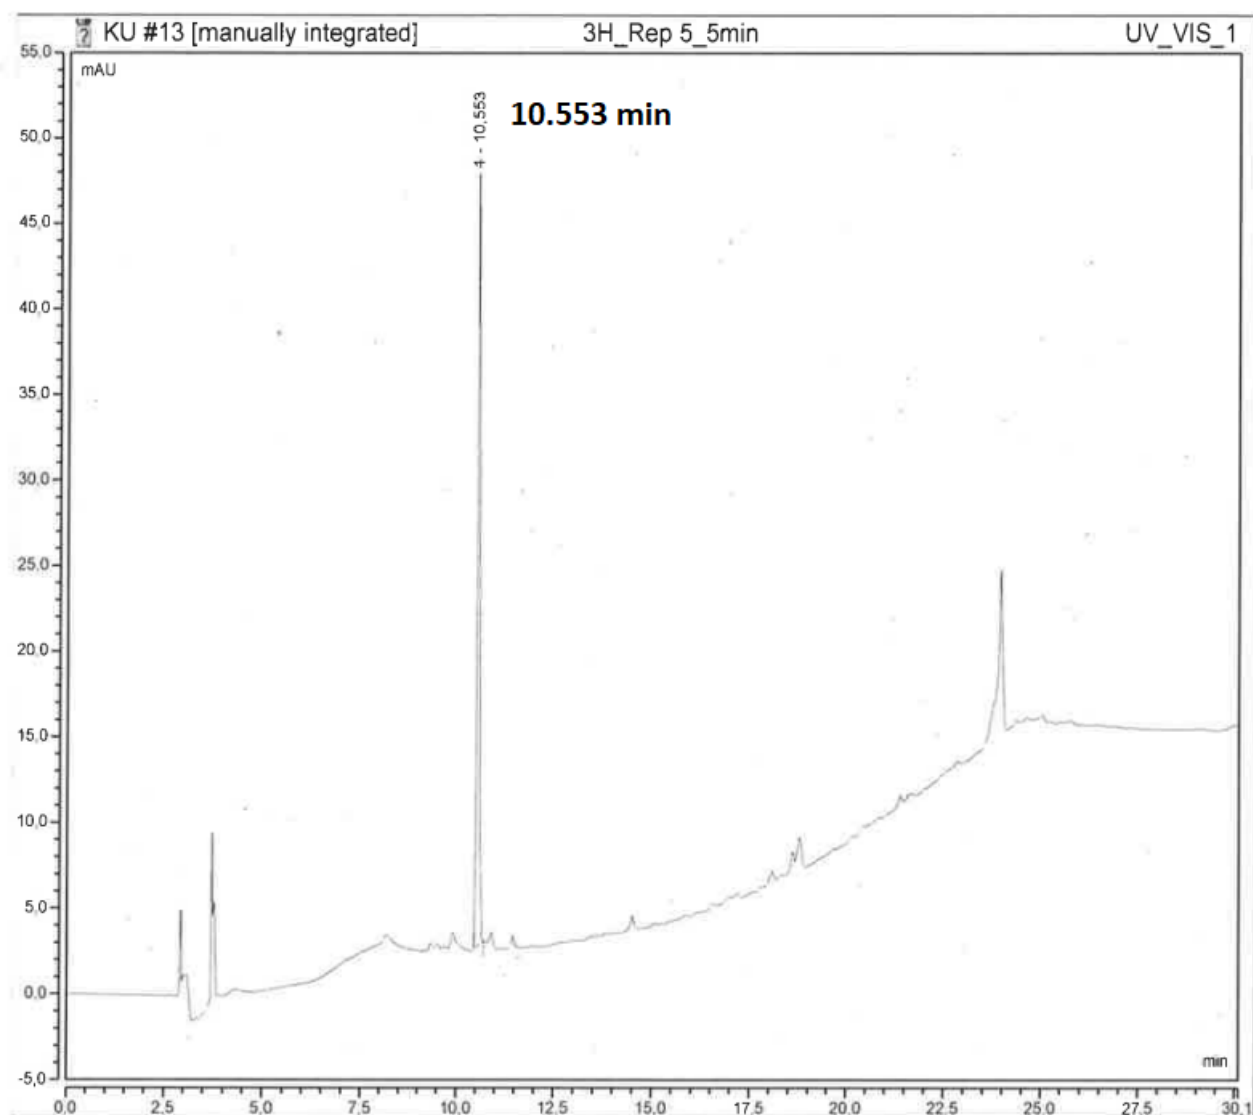

### 3. Pretargeted Autoradiography

SI-3-1 Raw data (fmol/mg) autoradiography. Calculated in GraphPad Prism, standard deviation calculated by ANOVA.

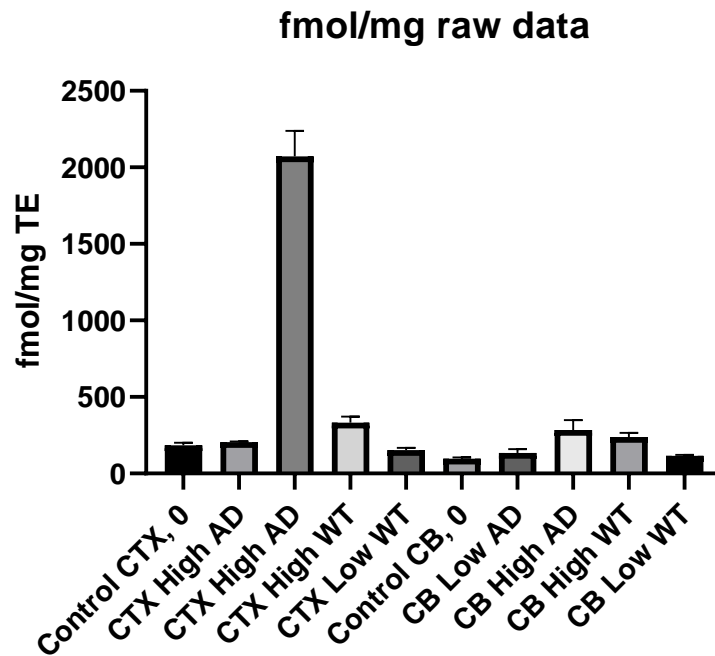

SI-3-2 Autoradiographic image as obtained in Image J

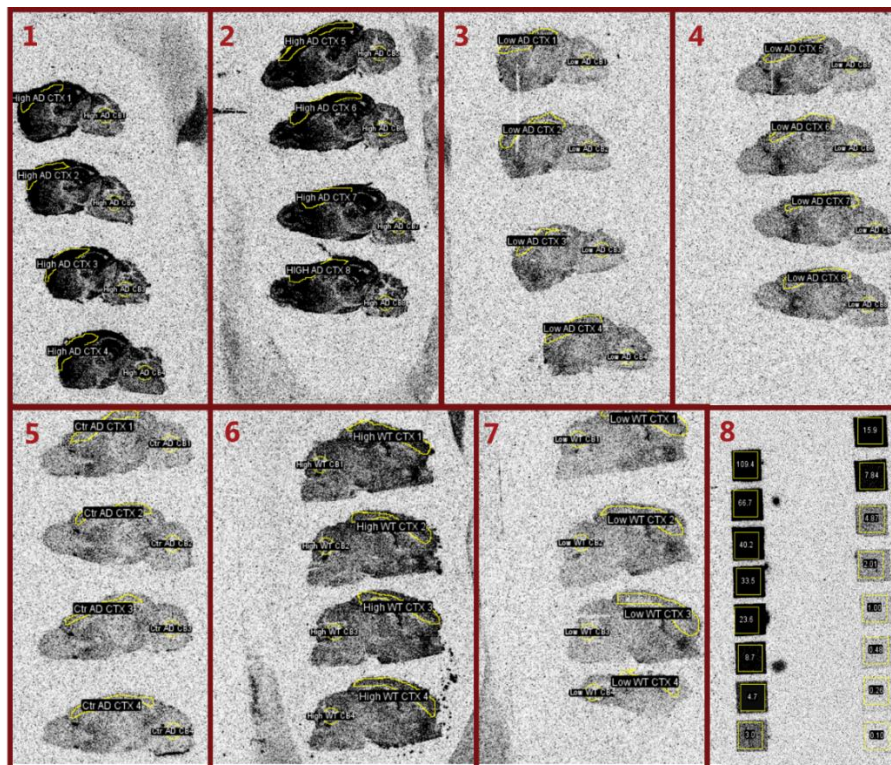

1: AD High 2: AD High 3: AD low 4: AD Low 5: AD Control 6: WT High 7: WT Low

SI-3-3 Raw Data of pretargeting autoradiography  $^3\text{H-Tz 16}$  as calculated by Image J.

|               |  |       |        |
|---------------|--|-------|--------|
| High AD CTX 1 |  | 0.040 | 24,635 |
| HIGH AD CTX 2 |  | 0.039 | 25,641 |
| HIGH AD CTX 3 |  | 0.053 | 24,940 |
| HIGH AD CTX 4 |  | 0.056 | 21,291 |
| HIGH AD CTX 5 |  | 0.059 | 24,460 |
| HIGH AD CTX 6 |  | 0.071 | 24,488 |
| HIGH AD CTX 7 |  | 0.058 | 28,652 |
| HIGH AD CTX 8 |  | 0.054 | 24,466 |
| LOW AD CTX 1  |  | 0.058 | 2,363  |
| LOW AD CTX 2  |  | 0.059 | 2,469  |
| LOW AD CTX 3  |  | 0.030 | 2,526  |
| LOW AD CTX 4  |  | 0.059 | 2,544  |
| LOW AD CTX 5  |  | 0.065 | 2,484  |
| LOW AD CTX 6  |  | 0.069 | 2,404  |
| LOW AD CTX 7  |  | 0.055 | 2,441  |
| LOW AD CTX 8  |  | 0.071 | 2,406  |
| CTR AD CTX 1  |  | 0.047 | 2,292  |
| CTR AD CTX 2  |  | 0.050 | 2,389  |
| CTR AD CTX 3  |  | 0.035 | 2,237  |
| CTR AD CTX 4  |  | 0.064 | 1,962  |
| HIGH WT CTX 1 |  | 0.071 | 4,688  |
| HIGH WT CTX 2 |  | 0.060 | 3,874  |
| HIGH WT CTX 3 |  | 0.066 | 3,645  |
| HIGH WT CTX 4 |  | 0.076 | 3,745  |
| LOW WT CTX 1  |  | 0.097 | 2,049  |
| LOW WT CTW 2  |  | 0.089 | 1,836  |
| LOW WT CTX 3  |  | 0.106 | 1,836  |
| LOW WT CTX 4  |  | 0.041 | 1,584  |
| High AD CB 1  |  | 0.018 | 3,338  |
| HIGH AD CB 2  |  | 0.018 | 3,973  |
| HIGH AD CB 3  |  | 0.018 | 2,992  |
| HIGH AD CB 4  |  | 0.018 | 4,935  |
| HIGH AD CB 5  |  | 0.018 | 3,132  |
| HIGH AD CB 6  |  | 0.018 | 2,630  |
| HIGH AD CB 7  |  | 0.017 | 3,584  |

|                     |              |              |
|---------------------|--------------|--------------|
| <b>HIGH AD CB 8</b> | <b>0.018</b> | <b>2,753</b> |
| <b>LOW AD CB 1</b>  | <b>0.018</b> | <b>1,777</b> |
| <b>LOW AD CB 2</b>  | <b>0.018</b> | <b>1,917</b> |
| <b>LOW AD CB 3</b>  | <b>0.018</b> | <b>1,918</b> |
| <b>LOW AD CB 4</b>  | <b>0.018</b> | <b>1,147</b> |
| <b>LOW AD CB 5</b>  | <b>0.018</b> | <b>1,378</b> |
| <b>LOW AD CB 6</b>  | <b>0.018</b> | <b>1,416</b> |
| <b>LOW AD CB 7</b>  | <b>0.018</b> | <b>1,709</b> |
| <b>LOW AD CB 8</b>  | <b>0.018</b> | <b>1,700</b> |
| <b>CTR AD CB 1</b>  | <b>0.018</b> | <b>1,266</b> |
| <b>CTR AD CB 2</b>  | <b>0.018</b> | <b>1,103</b> |
| <b>CTR AD CB 3</b>  | <b>0.018</b> | <b>1,226</b> |
| <b>CTR AD CB 4</b>  | <b>0.018</b> | <b>1,090</b> |
| <b>HIGH WT CB 1</b> | <b>0.018</b> | <b>3,304</b> |
| <b>HIGH WT CB 2</b> | <b>0.018</b> | <b>2,914</b> |
| <b>HIGH WT CB 3</b> | <b>0.018</b> | <b>2,676</b> |
| <b>HIGH WT CB 4</b> | <b>0.018</b> | <b>2,533</b> |
| <b>LOW WT CB 1</b>  | <b>0.018</b> | <b>1,431</b> |
| <b>LOW WT CB 2</b>  | <b>0.018</b> | <b>1,312</b> |
| <b>LOW WT CB 3</b>  | <b>0.018</b> | <b>1,475</b> |
| <b>LOW WT CB 4</b>  | <b>0.018</b> | <b>1,374</b> |

# 1. NMR Spectra

## 3-(4-(allyloxy)phenyl)-1,2,4,5-tetrazine (7)

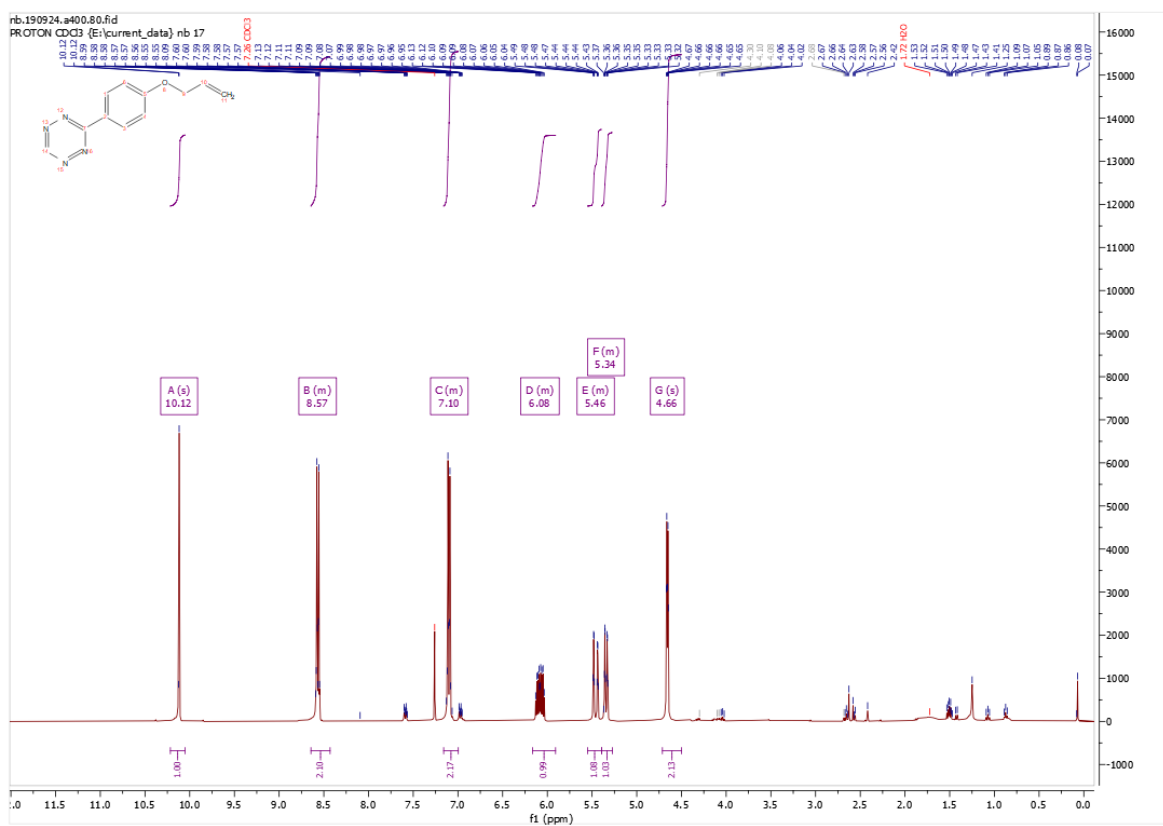

## 4-(1,3-dioxolan-2-yl)benzonitrile (10)

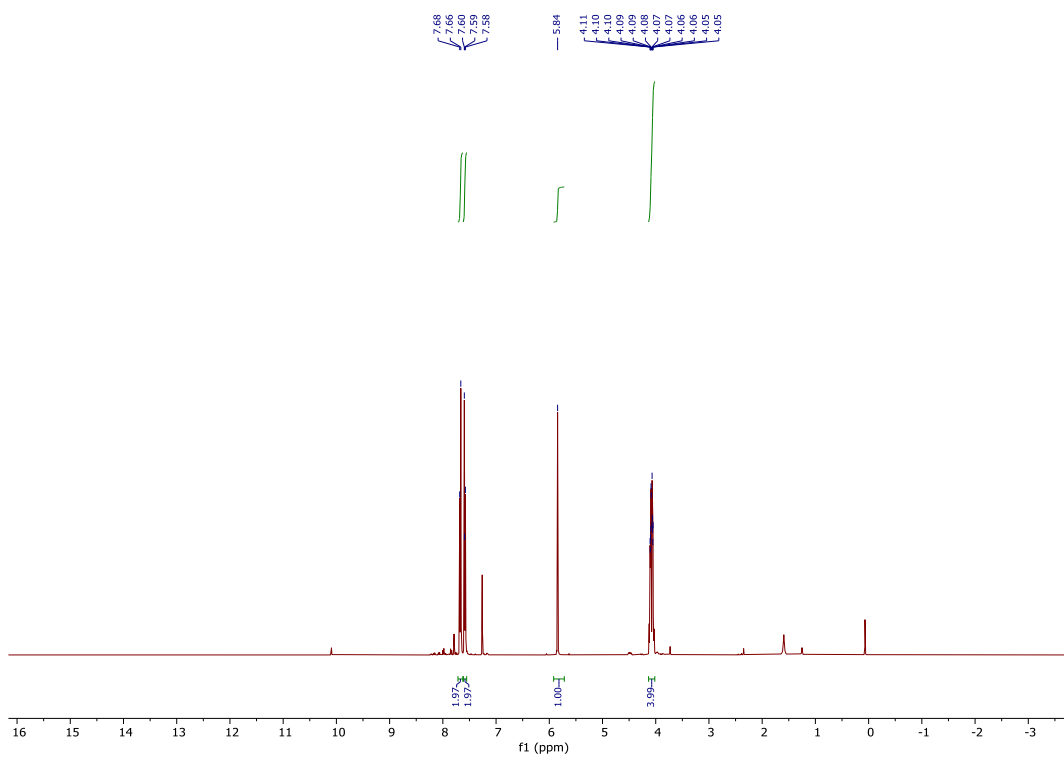

**3-(4-(1,3-dioxolan-2-yl)phenyl)-6-(pyridin-2-yl)-1,4-dihydro-1,2,4,5-tetrazine (11)**

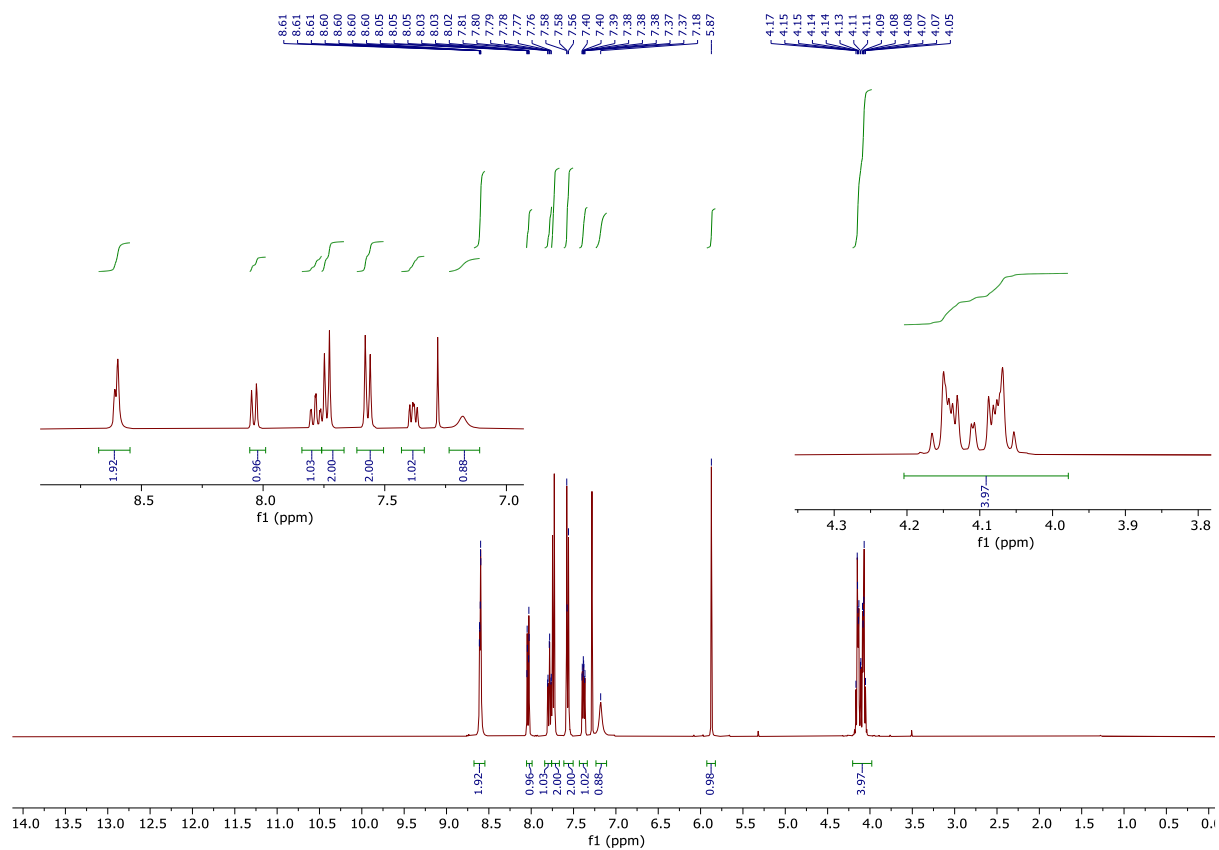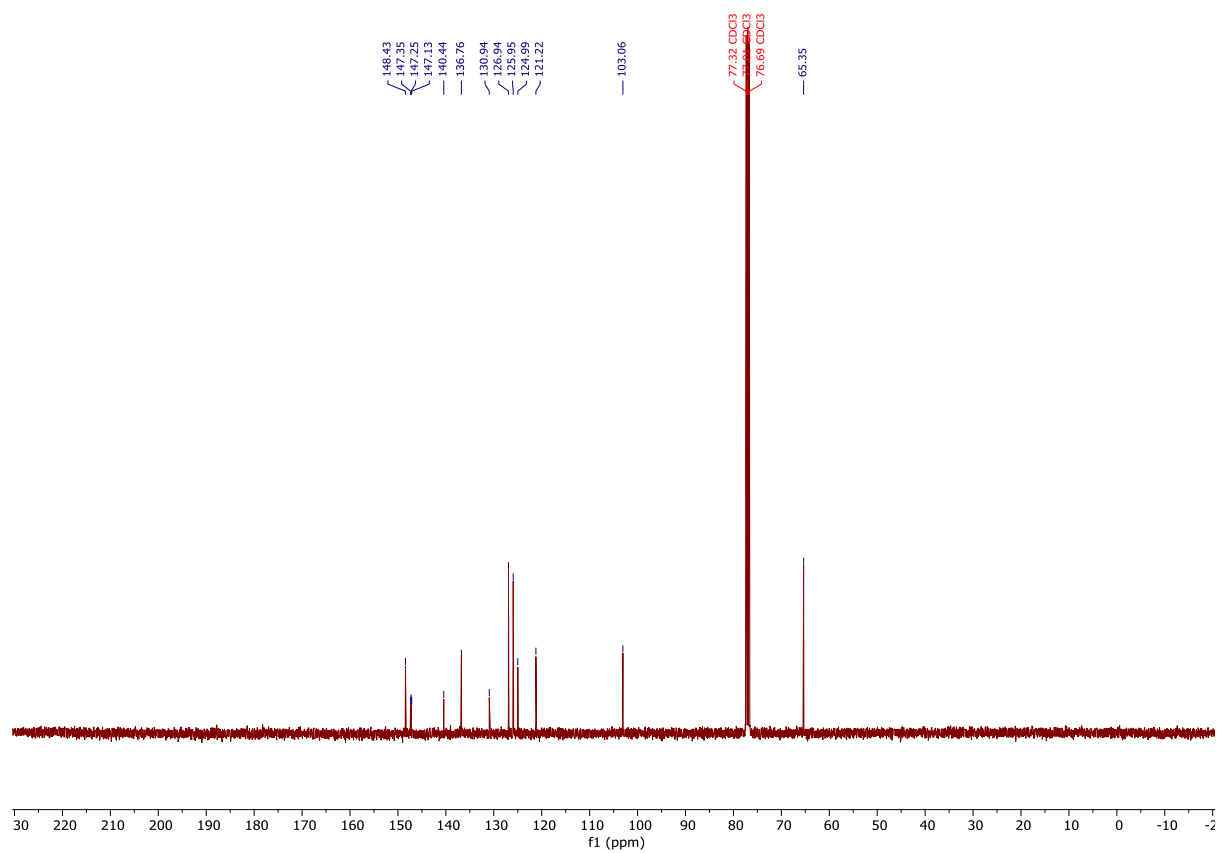



**(4-(6-(pyridin-2-yl)-1,2,4,5-tetrazin-3-yl)phenyl)methanol (13)**

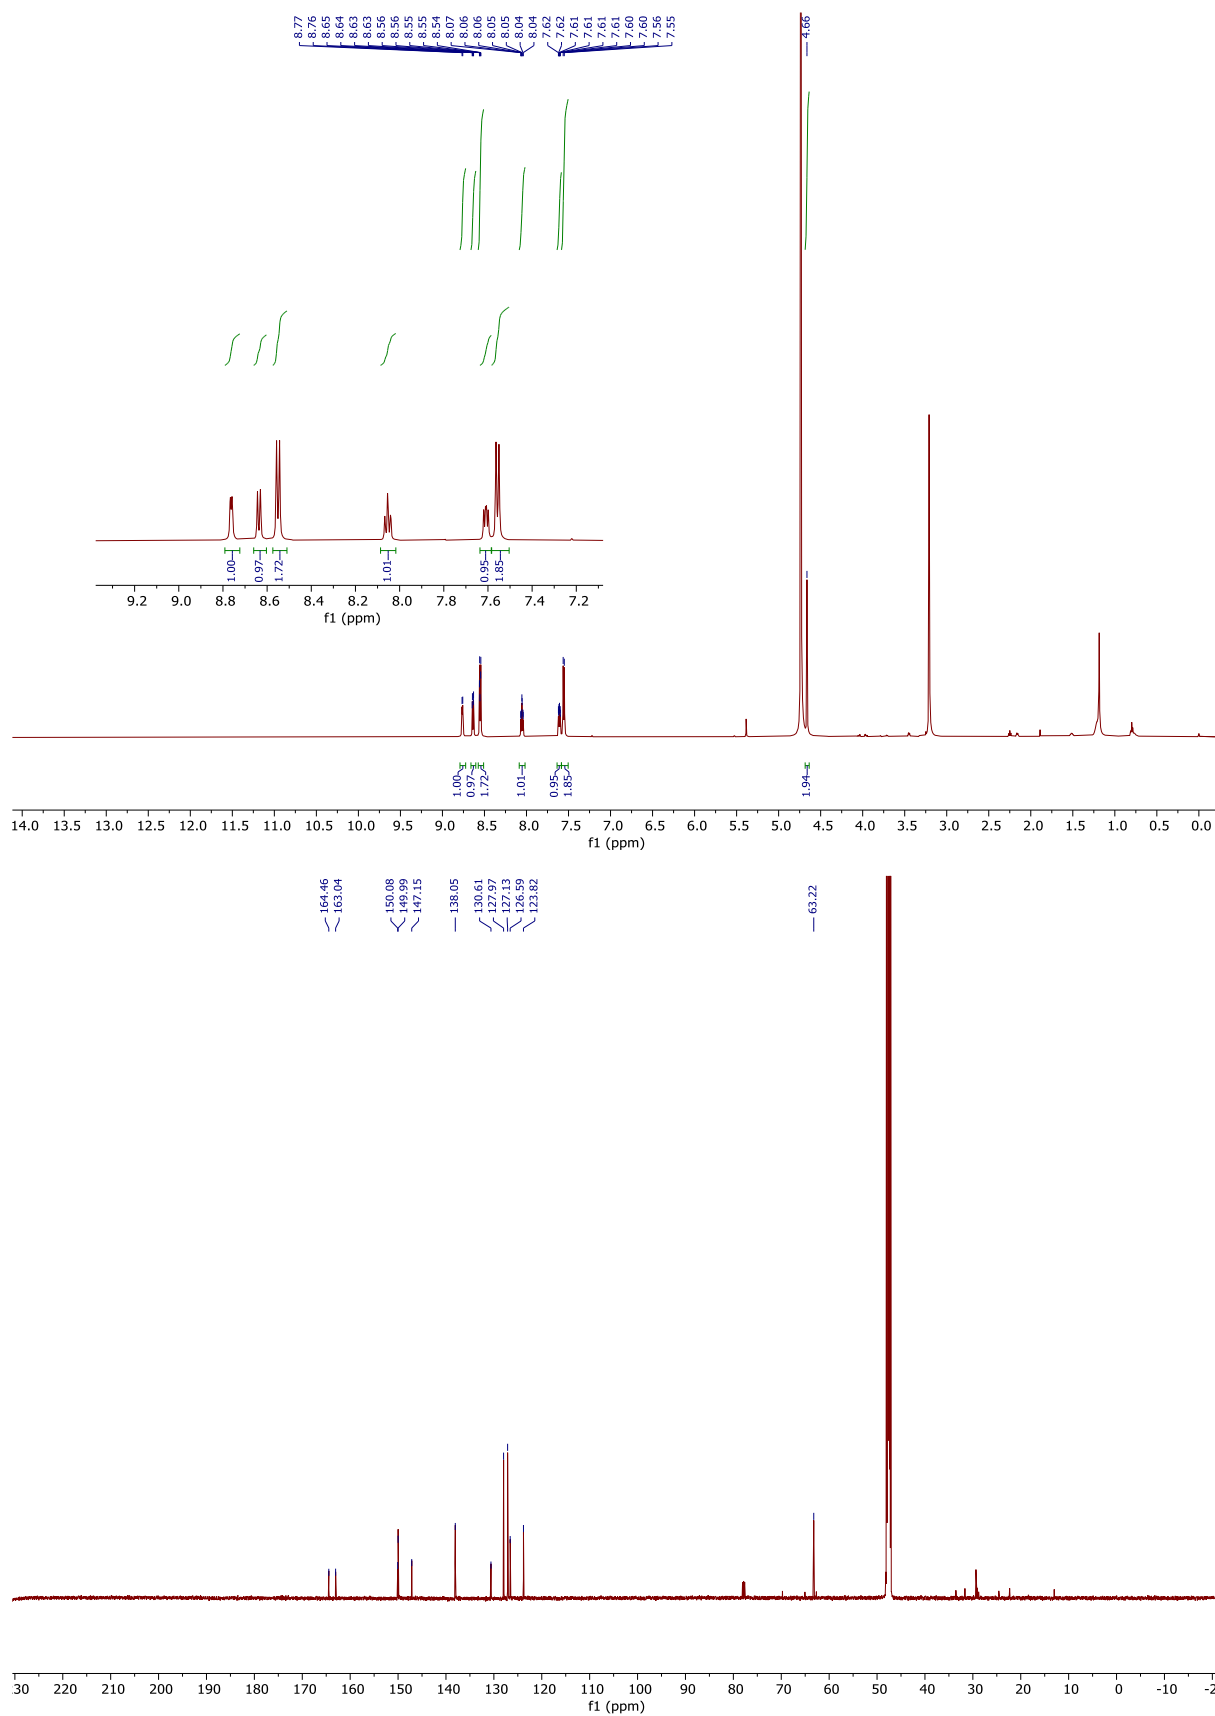



**(4-(6-(Pyridin-2-yl)-1,2,4,5-tetrazin-3-yl)phenyl)methan-d-ol (14)**

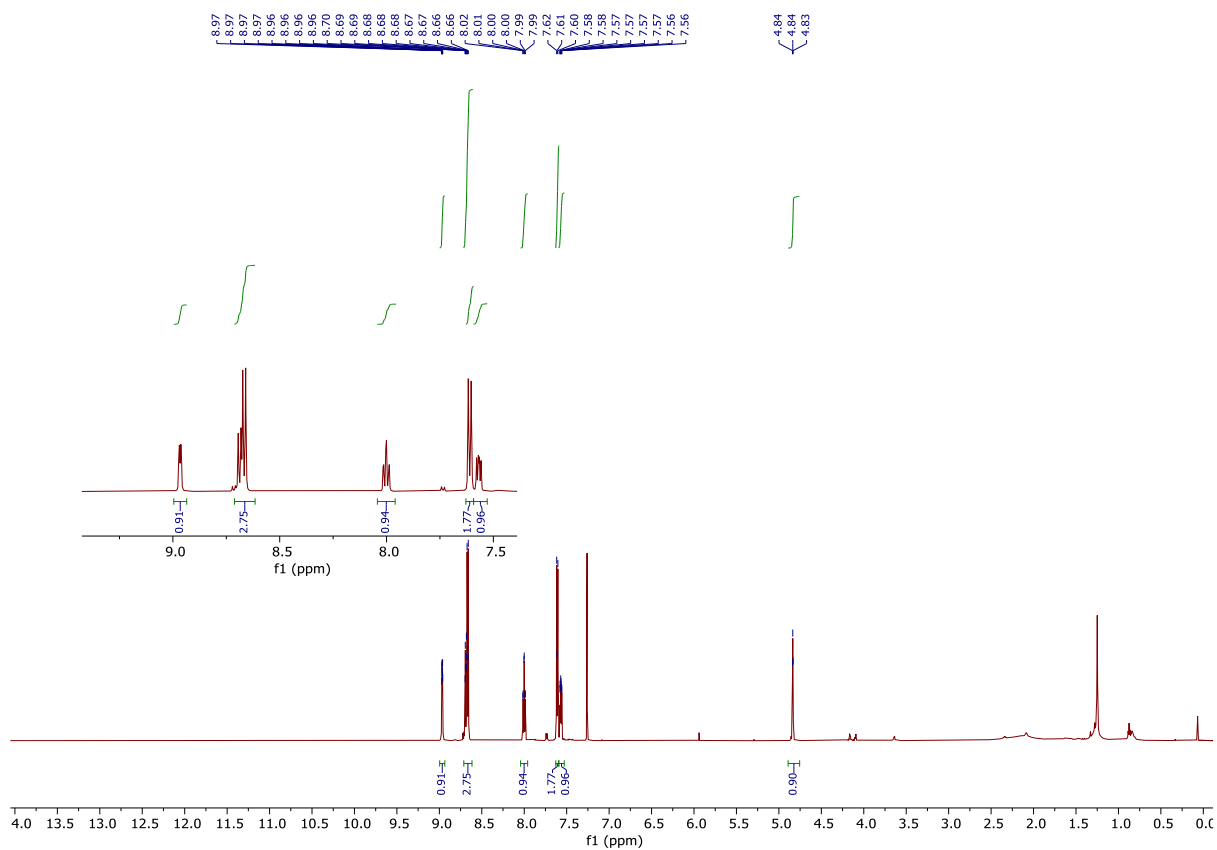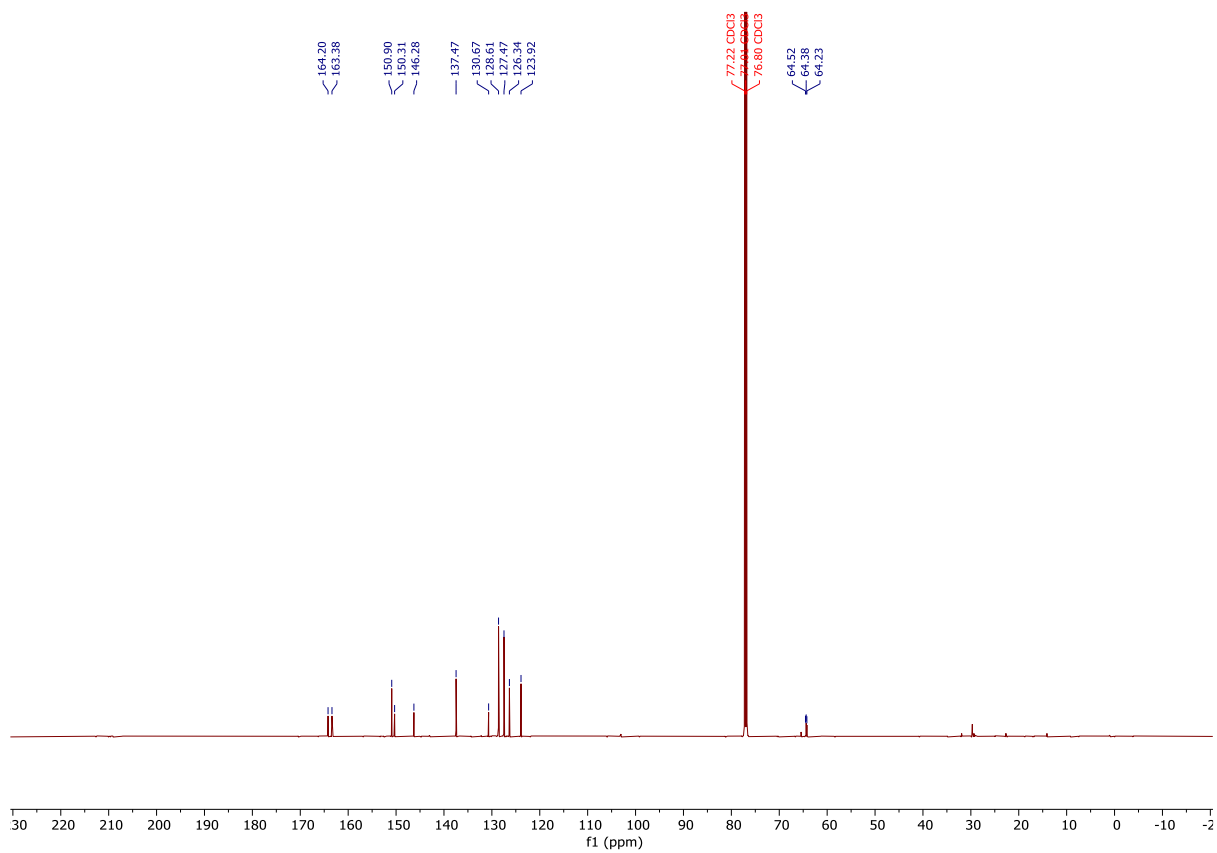

**4-(6-(pyridin-2-yl)-1,2,4,5-tetrazin-3-yl)benzaldehyde (15)**

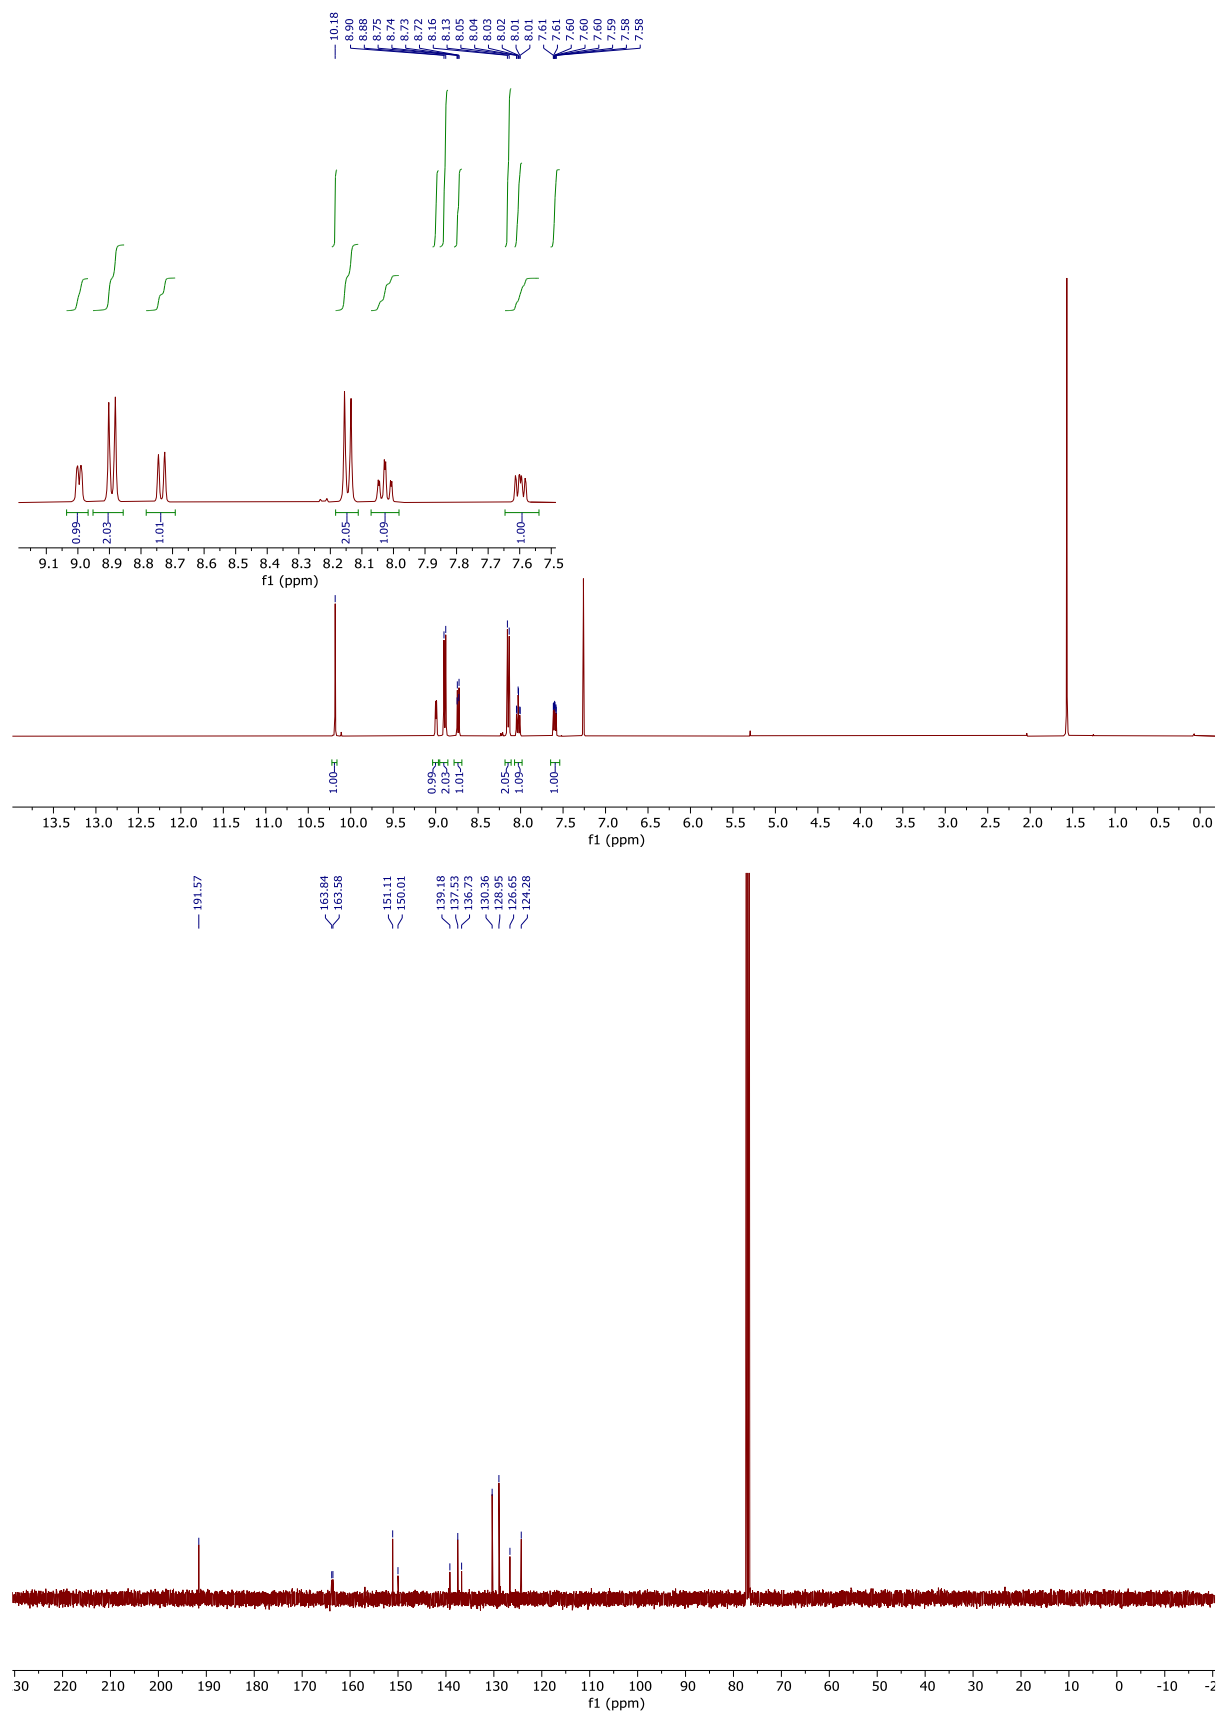

## References

- [1] a) in *Introduction*, **2009**, pp. 1-23; b) A. Hadj-Hamdri, A. Vidal-Cros, M. Gaudry, F. Sobrio and B. Rousseau, *Journal of Labelled Compounds and Radiopharmaceuticals* **1995**, *36*, 795-799.
- [2] M. Saljoughian, H. Morimoto, P. G. Williams, C. Than and S. J. Seligman, *The Journal of Organic Chemistry* **1996**, *61*, 9625-9628.
- [3] N. Ahmed and J. E. Van Lier, *Journal of Chemical Research* **2006**, *2006*, 584-585.
- [4] a) G. D. Angel and J. L. Benitez, *Journal of Molecular Catalysis A: Chemical* **2001**, *165*, 9-13; b) J. B. Hoke, G. A. Gramiccioni and E. N. Balko, *Applied Catalysis B: Environmental* **1992**, *1*, 285-296.
- [5] a) R. Schwob and J. Wuersch, *Journal of Labelled Compounds and Radiopharmaceuticals* **1978**, *14*, 355-360; b) M. Saljoughian, H. Morimoto and P. G. Williams, *Journal of the Chemical Society, Perkin Transactions 1* **1990**, 1803-1808.
- [6] N. H. Sagert and R. M. L. Pouteau, *Canadian Journal of Chemistry* **1974**, *52*, 2960-2967.
- [7] M. S. Viciu, G. A. Grasa and S. P. Nolan, *Organometallics* **2001**, *20*, 3607-3612.
- [8] A. Zask and P. Helquist, *The Journal of Organic Chemistry* **1978**, *43*, 1619-1620.
- [9] A. Bhattacharjya, P. Klumphu and B. H. Lipshutz, *Organic Letters* **2015**, *17*, 1122-1125.
